# Supplementary material for: Spatial and Temporal Analysis of Drinking Water Quality Using GIS-Based Geostatistical Techniques
Source: Research Square preprint supplement (doi:10.21203/rs.3.rs-8234836/v1), 2026-02-09
Supplement: Supplementary file 1 [file 21a7da9e421c4ffc7f956916.docx]

**Supplementary Table 1**. Descriptive statistics for water quality parameters during the dry and wet seasons for 2017

| Season | Dry season | | | | Wet season | | | |  |
| --- | --- | --- | --- | --- | --- | --- | --- | --- | --- |
| Parameters | S1 | S2 | S3 | S4 | S1 | S2 | S3 | S4 | WHO |
| Turbidity(NTU) | 1.66 | 1.46 | 0.95 | 1.58 | 4.15 | 3.33 | 3.84 | 4.27 | 5 |
| pH | 6.13 | 6.50 | 6.80 | 5.68 | 6.59 | 6.53 | 6.87 | 6.96 | 6.5-8.5 |
| TDS (mg/L) | 131.70 | 126.60 | 115.15 | 269.50 | 273.50 | 314.75 | 210.00 | 296.83 | 1000 |
| EC (uS/cm) | 356.95 | 612.67 | 469.88 | 530.53 | 552.00 | 494.75 | 420.00 | 593.00 | 300 |
| NO3 (mg/L) | 1.25 | 1.10 | 1.05 | 1.95 | 2.07 | 1.43 | 1.88 | 2.14 | 50 |
| NH3 (mg/L) | 0.21 | 0.20 | 0.22 | 0.20 | 0.27 | 0.23 | 0.10 | 0.05 | 1.50 |
| PO4 (mg/L) | 0.35 | 0.34 | 0.33 | 0.33 | 0.34 | 0.30 | 0.28 | 0.36 | 0.5 |
| Ca (mg/L) | 5.67 | 8.76 | 14.56 | 15.98 | 9.43 | 15.89 | 18.54 | 18.98 | 50 |
| Mg (mg/L) | 12.76 | 18.88 | 22.23 | 24.65 | 25.00 | 28.96 | 30.43 | 43.65 | 75 |
| Fe (mg/L) | 0.11 | 0.2 | 0.09 | 0.02 | 0.12 | 0.05 | 0.10 | 0.08 | 0.3 |

**Supplementary Table 2**. Descriptive statistics for water quality parameters during the dry and wet seasons of 2020

| Season | Dry season | | | | Wet season | | | | WHO |
| --- | --- | --- | --- | --- | --- | --- | --- | --- | --- |
| Parameters | S1 | S2 | S3 | S4 | S1 | S2 | S3 | S4 |  |
| Turbidity(NTU) | 4.34 | 5.90 | 0.7 | 2.98 | 10.94 | 7.69 | 3.37 | 15.20 | 5 |
| pH | 4.97 | 6.47 | 6.06 | 5.37 | 6.54 | 5.94 | 5.40 | 5.70 | 6.5-8.5 |
| TDS (mg/L) | 202.8 | 350.71 | 298.28 | 297.10 | 319.4 | 276.44 | 250.68 | 338.94 | 1000 |
| EC (uS/cm) | 368.7 | 637.66 | 542.32 | 540.18 | 580.86 | 502.61 | 455.79 | 616.25 | 300 |
| NO3 (mg/L) | 2.14 | 1.64 | 1.37 | 3.06 | 2.82 | 2.09 | 2.05 | 3.15 | 50 |
| NH3 (mg/L) | 0.20 | 0.20 | 0.24 | 0.21 | 0.36 | 0.26 | 0.16 | 0.07 | 1.50 |
| PO4 (mg/L) | 0.24 | 0.36 | 0.41 | 0.61 | 0.43 | 0.41 | 0.39 | 0.72 | 0.5 |
| Ca (mg/L) | 6.33 | 10.75 | 17 | 28.50 | 11.75 | 17.50 | 20 | 23.75 | 50 |
| Mg (mg/L) | 14.67 | 21.25 | 27.25 | 27.75 | 32.50 | 32 | 37 | 52 | 75 |
| Fe (mg/L) | 0.12 | 0.03 | 0.11 | 0.04 | 0.16 | 0.11 | 0.12 | 0.17 | 0.3 |

**Supplementary Table 3.** Results of a paired sample t-test indicating seasonal variations in water quality parameters for the year 2017.

| Pairs | WS-DS | Mean | StDE | Lbound | Ubound | t | df | Sig.(2-tailed) |
| --- | --- | --- | --- | --- | --- | --- | --- | --- |
| 1 | Turbidity | 2.49 | 0.22 | 1.78 | 3.19 | 11.262 | 3 | 0.002 |
| 2 | PH | 0.47 | 0.29 | -0.45 | 1.38 | 1.617 | 3 | 0.204 |
| 3 | TDS | 112.8768.94 | 34.47 | 3.17 | 222.57 | 3.274 | 3 | 0.047 |
| 4 | EC | 22.43 | 68.51 | -195.61 | 240.47 | 0.327 | 3 | 0.765 |
| 5 | NO3 | 0.54 | 0.17 | 0.02 | 1.07 | 3.276 | 3 | 0.047 |
| 6 | NH3 | -0.05 | 0.05 | -2.21 | 0.12 | -0.854 | 3 | 0.456 |
| 7 | PO4 | -0.02 | 0.02 | -0.07 | 0.04 | -0.974 | 3 | 0.402 |
| 7 | Ca | 4.47 | 0.91 | 1.57 | 7.37 | 4.899 | 3 | 0.016 |
| 9 | Mg | 12.38 | 2.36 | 4.88 | 19.88 | 5.255 | 3 | 0.013 |
| 10 | Fe | -0.02 | 0.05 | -0.16 | 0.13 | -0.383 | 3 | 0.727 |

Hint: WS = wet season, DS = dry season, StDE = standard deviation error, Lbound = lower bound, Ubound = upper bound, t= t-statistics, df = degrees of freedom, and Sig. = significance.

**Supplementary Table 4**. Results of a paired sample t-test indicating seasonal variations in water quality parameters for the year 2020.

| Pairs | WS-DS | Mean | StDE | Lbound | Ubound | t | df | Sig.(2-tailed) |
| --- | --- | --- | --- | --- | --- | --- | --- | --- |
| 1 | Turbidity | 5.894.77 | 2.38 | -1.70 | 13.47 | 2.47 | 3 | 0.09 |
| 2 | PH | 0.080.85 | 0.42 | -1.27 | 1.42 | 0.18 | 3 | 0.87 |
| 3 | TDS | 9.5787.88 | 43.94 | -130.26 | 149.41 | 0.22 | 3 | 0.84 |
| 4 | EC | 17.41 | 79.89 | -236.83 | 271.65 | 0.22 | 3 | 0.84 |
| 5 | NO3 | 0.490.29 | 0.14 | 0.02 | 0.95 | 3.35 | 3 | 0.04 |
| 6 | NH3 | 0.00 0.13 | 0.06 | -0.21 | 0.20 | -0.07 | 3 | 0.95 |
| 7 | PO4 | 0.09 0.09 | 0.05 | -0.06 | 0.23 | 1.88 | 3 | 0.16 |
| 8 | Ca | 2.31 4.96 | 2.48 | -5.58 | 10.20 | 0.93 | 3 | 0.42 |
| 9 | Mg | 15.446.69 | 3.35 | 4.79 | 26.09 | 4.61 | 3 | 0.02 |
| 10 | Fe | 0.070.05 | 0.03 | -0.02 | 0.15 | 2.53 | 3 | 0.09 |

Hint: WS = wet season, DS = dry season, StDE = standard deviation error, Lbound = lower bound, Ubound = upper bound, t= t-statistics, df = degrees of freedom, and Sig. = significance.

**Supplementary Table 5.** ANOVA results for water Quality parameters during the 2017 dry Season

| Parameters | Groups | SS | df | MS | F | Sig. |
| --- | --- | --- | --- | --- | --- | --- |
|  | BG | 1.214 | 3 | 0.405 | 0.646 | 0.600 |
| Turbidity | WG | 7.524 | 12 | 0.627 |  |  |
|  | Total | 8.738 | 15 |  |  |  |
|  | BG | 2.792 | 3 | 0.931 | 1.048 | 0.407 |
| PH | WG | 10.658 | 12 | 0.888 |  |  |
|  | Total | 13.450 | 15 |  |  |  |
|  | BG | 63947.287 | 3 | 21315.762 | 14.158 | 0.001 |
| TDS | WG | 18066.238 | 12 | 1505.520 |  |  |
|  | Total | 82013.524 | 15 |  |  |  |
|  | BG | 139084.884 | 3 | 46361.628 | 2.927 | 0.077 |
| EC | WG | 190062.992 | 12 | 15838.583 |  |  |
|  | Total | 329147.875 | 15 |  |  |  |
|  | BG | 2.090 | 3 | 0.697 | 56.855 | 0.001 |
| NO3 | WG | 0.147 | 12 | 0.012 |  |  |
|  | Total | 2.237 | 15 |  |  |  |
|  | BG | 0.001 | 3 | 0.000 | 0.098 | 0.960 |
| NH3 | WG | 0.051 | 12 | 0.004 |  |  |
|  | Total | 0.052 | 15 |  |  |  |
|  | BG | 0.001 | 3 | 0.000 | .030 | 0.993 |
| PO4 | WG | 0.101 | 12 | 0.008 |  |  |
|  | Total | 0.102 | 15 |  |  |  |
|  | BG | 281.366 | 3 | 93.789 | 38.966 | 0.001 |
| Ca | WG | 28.884 | 12 | 2.407 |  |  |
|  | Total | 310.250 | 15 |  |  |  |
|  | BG | 318.924 | 3 | 106.308 | 125.804 | 0.001 |
| Mg | WG | 10.140 | 12 | 0.845 |  |  |
|  | Total | 329.065 | 15 |  |  |  |
|  | BG | 0.066 | 3 | 0.022 | 52.800 | 0.001 |
| Fe | WG | 0.005 | 12 | 0.000 |  |  |
|  | Total | 0.071 | 15 |  |  |  |

Hint: SS = sum of squares, MS = mean square, df = degree of freedom and Sig. = significance.

**Supplementary Table 6**. ANOVA results for water Quality parameters during the 2017 wet Season

| Parameters | Groups | SS | df | MS | F | Sig. |
| --- | --- | --- | --- | --- | --- | --- |
|  | BG | 2.136 | 3 | 0.712 | 0.472 | 0.708 |
| Turbidity | WG | 18.115 | 12 | 1.510 |  |  |
|  | Total | 20.250 | 15 |  |  |  |
|  | BG | .544 | 3 | 0.181 | 1.250 | 0.335 |
| PH | WG | 1.739 | 12 | 0.145 |  |  |
|  | Total | 2.283 | 15 |  |  |  |
|  | BG | 25050.688 | 3 | 8350.229 | 1.323 | 0.313 |
| TDS | WG | 75754.750 | 12 | 6312.896 |  |  |
|  | Total | 100805.438 | 15 |  |  |  |
|  | BG | 67552.188 | 3 | 22517.396 | 0.791 | 0.522 |
| EC | WG | 341438.750 | 12 | 28453.229 |  |  |
|  | Total | 408990.937 | 15 |  |  |  |
|  | BG | 1.242 | 3 | 0.414 | 2.156 | 0.146 |
| NO3 | WG | 2.303 | 12 | 0.192 |  |  |
|  | Total | 3.545 | 15 |  |  |  |
|  | BG | 0.137 | 3 | 0.046 | 0.888 | 0.475 |
| NH3 | WG | 0.616 | 12 | 0.051 |  |  |
|  | Total | 0.753 | 15 |  |  |  |
|  | BG | 0.013 | 3 | 0.004 | 0.584 | 0.637 |
| PO4 | WG | 0.092 | 12 | 0.008 |  |  |
|  | Total | 0.105 | 15 |  |  |  |
|  | BG | 232.621 | 3 | 77.540 | 40.738 | 0.001 |
| Ca | WG | 22.841 | 12 | 1.903 |  |  |
|  | Total | 255.462 | 15 |  |  |  |
|  | BG | 785.156 | 3 | 261.719 | 86.125 | 0.001 |
| Mg | WG | 36.466 | 12 | 3.039 |  |  |
|  | Total | 821.622 | 15 |  |  |  |
|  | BG | .010 | 3 | 0.003 | 6.685 | 0.007 |
| Fe | WG | .006 | 12 | 0.001 |  |  |
|  | Total | .016 | 15 |  |  |  |

Hint: SS = sum of squares, MS = mean square, df = degree of freedom and Sig. = significance.

**Supplementary Table 7**. ANOVA results for water Quality parameters during the 2020 dry Season

| Parameters | Groups | SS | df | MS | F | Sig. |
| --- | --- | --- | --- | --- | --- | --- |
|  | BG | 57.905 | 3 | 19.302 | 3.769 | 0.041 |
| Turbidity | WG | 61.455 | 12 | 5.121 |  |  |
|  | Total | 119.361 | 15 |  |  |  |
|  | BG | 3.469 | 3 | 1.156 | 1.629 | 0.235 |
| PH | WG | 8.521 | 12 | 0.710 |  |  |
|  | Total | 11.990 | 15 |  |  |  |
|  | BG | 46637.638 | 3 | 15545.879 | 5.042 | 0.017 |
| TDS | WG | 36996.401 | 12 | 3083.033 |  |  |
|  | Total | 83634.038 | 15 |  |  |  |
|  | BG | 154178.091 | 3 | 51392.697 | 5.043 | 0.017 |
| EC | WG | 122302.511 | 12 | 10191.876 |  |  |
|  | Total | 276480.602 | 15 |  |  |  |
|  | BG | 6.649 | 3 | 2.216 | 48.566 | 0.001 |
| NO3 | WG | 0.548 | 12 | 0.046 |  |  |
|  | Total | 7.197 | 15 |  |  |  |
|  | BG | 0.004 | 3 | 0.001 | .275 | 0.843 |
| NH3 | WG | 0.051 | 12 | 0.004 |  |  |
|  | Total | 0.055 | 15 |  |  |  |
|  | BG | 0.294 | 3 | 0.098 | 4.863 |  |
| PO4 | WG | 0.242 | 12 | 0.020 |  | 0.019 |
|  | Total | 0.535 | 15 |  |  |  |
|  | BG | 1028.188 | 3 | 342.729 | 24.964 | 0.001 |
| Ca | WG | 164.750 | 12 | 13.729 |  |  |
|  | Total | 1192.938 | 15 |  |  |  |
|  | BG | 399.688 | 3 | 133.229 | 9.793 | 0.002 |
| Mg | WG | 163.250 | 12 | 13.604 |  |  |
|  | Total | 562.938 | 15 |  |  |  |
|  | BG | 0.026 | 3 | 0.009 | 19.555 | 0.001 |
| Fe | WG | 0.005 | 12 | 0.000 |  |  |
|  | Total | 0.032 | 15 |  |  |  |

Hint: SS = sum of squares, MS = mean square, df = degree of freedom and Sig. = significance.

**Supplementary Table 8**. ANOVA results for water Quality parameters during the 2020 wet Season

| Parameters | Groups | SS | df | MS | F | Sig. |
| --- | --- | --- | --- | --- | --- | --- |
|  | BG | 300.994 | 3 | 100.331 | 5.470 | 0.013 |
| Turbidity | WG | 220.100 | 12 | 18.342 |  |  |
|  | Total | 521.094 | 15 |  |  |  |
|  | BG | 2.804 | 3 | .935 | 1.732 |  |
| PH | WG | 6.475 | 12 | .540 |  | 0.214 |
|  | Total | 9.279 | 15 |  |  |  |
|  | BG | 19321.477 | 3 | 6440.492 | .855 | 0.490 |
| TDS | WG | 90371.088 | 12 | 7530.924 |  |  |
|  | Total | 109692.565 | 15 |  |  |  |
|  | BG | 63873.352 | 3 | 21291.117 | .855 | 0.490 |
| EC | WG | 298746.530 | 12 | 24895.544 |  |  |
|  | Total | 362619.882 | 15 |  |  |  |
|  | BG | 3.555 | 3 | 1.185 | 3.726 | 0.042 |
| NO3 | WG | 3.816 | 12 | 0.318 |  |  |
|  | Total | 7.370 | 15 |  |  |  |
|  | BG | 0.190 | 3 | 0.063 | 4.875 | 0.019 |
| NH3 | WG | 0.156 | 12 | 0.013 |  |  |
|  | Total | 0.345 | 15 |  |  |  |
|  | BG | 0.284 | 3 | 0.095 | 2.407 | 0.118 |
| PO4 | WG | 0.472 | 12 | 0.039 |  |  |
|  | Total | 0.755 | 15 |  |  |  |
|  | BG | 304.500 | 3 | 101.500 | 2.287 | 0.131 |
| Ca | WG | 532.500 | 12 | 44.375 |  |  |
|  | Total | 837.000 | 15 |  |  |  |
|  | BG | 1050.750 | 3 | 350.250 | 6.496 | 0.007 |
| Mg | WG | 647.000 | 12 | 53.917 |  |  |
|  | Total | 1697.750 | 15 |  |  |  |
|  | BG | 0.011 | 3 | 0.004 | 0.516 | 0.679 |
| Fe | WG | 0.089 | 12 | 0.007 |  |  |
|  | Total | 0.100 | 15 |  |  |  |

Hint: SS = sum of squares, MS = mean square, df = degree of freedom and Sig. = significance.
